# Supplementary material for: Immunological detection of thymine dimers in indigenous genomic DNA from pre-disinfection drinking water as an ultraviolet disinfection dosimeter
Source: Royal Society of Chemistry journal article supplement (doi:10.1039/d0ew00939c), 2021-01-01
Supplement: d0ew00939c1.pdf [file d0ew00939c1.pdf]

## Supporting Information

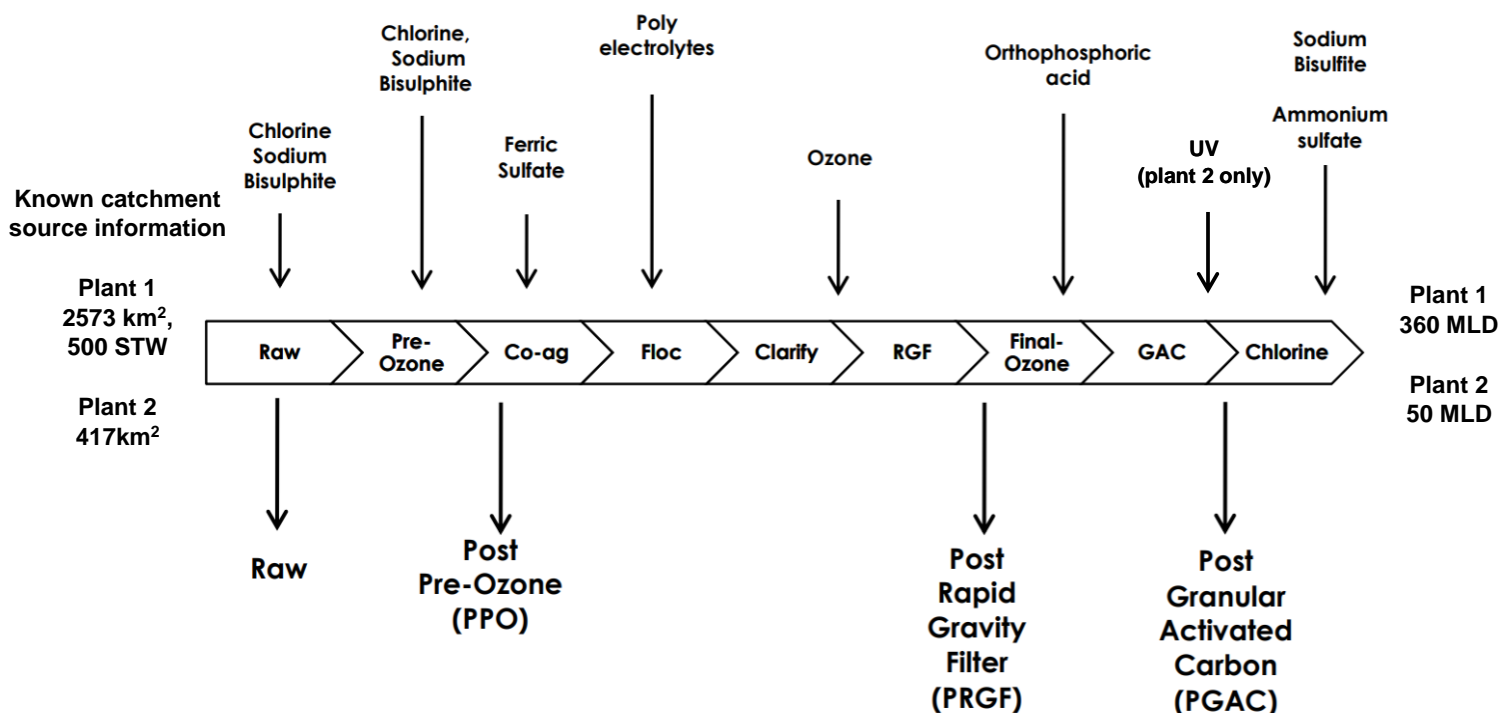

**Figure S.1 - Schematic of the treatment processes of UK works providing samples.** Plant 2 included a UV disinfection system prior to chlorination, but no post-UV pre-chlorination sample point. STW= Sewage Treatment Works.

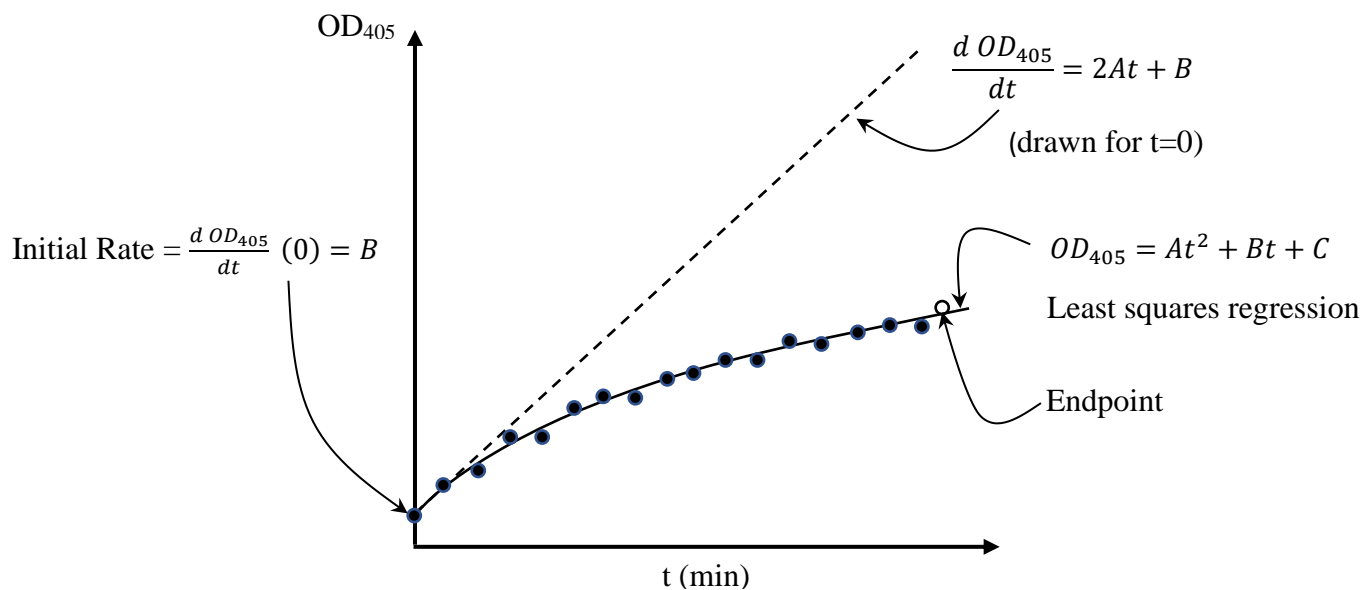

**Figure S.2 – Initial rate vs endpoint analysis schemes.**

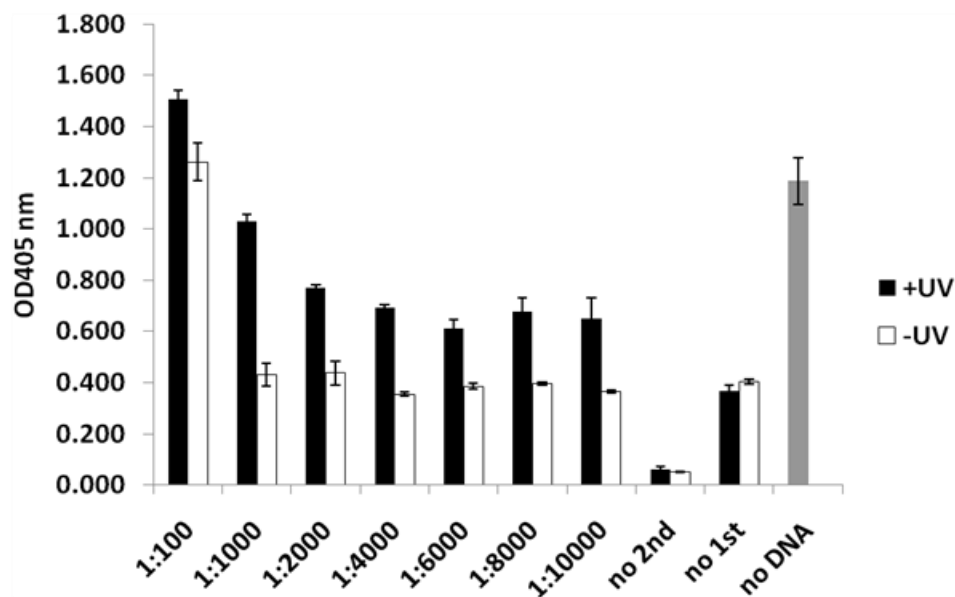

**Figure S.3 - Primary antibody (H3Ab) dilution optimisation.** Secondary antibody used at 1:500 dilution. Primary antibody used at 1:100 dilution for “no 2<sup>nd</sup>” and “no DNA” controls. ELISA development time t=50mins. Error bars are  $1.96 \times$  Standard Error.

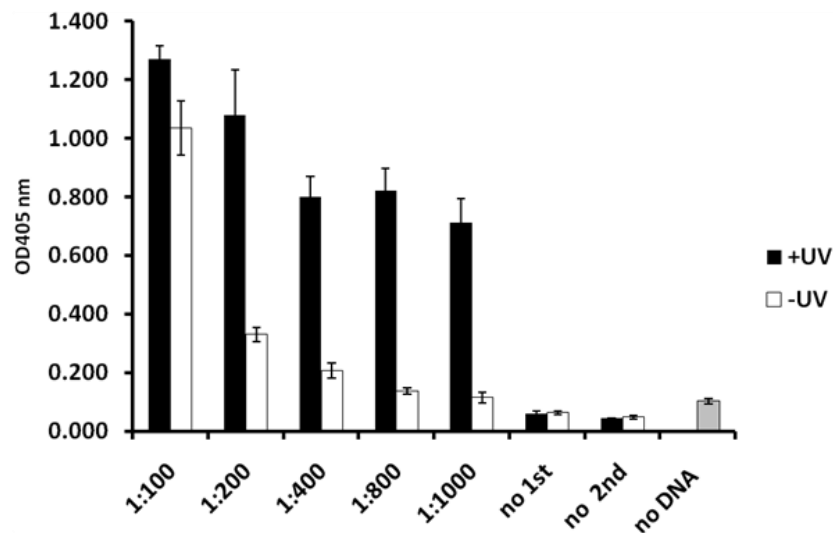

|     | 1:100 | 1:200 | 1:400 | 1:800 | 1:1000 | no 1st | no 2nd | no DNA |
|-----|-------|-------|-------|-------|--------|--------|--------|--------|
| S/N | 1.226 | 3.262 | 3.859 | 6.007 | 6.168  | 0.963  | 0.915  | -      |

**Figure S.4 - Further optimisation of H3Ab dilution with signal to noise ratio (S/N) for each condition.** Secondary antibody used at 1:500 dilution. Primary antibody used at 1:1000 dilution for “no 2<sup>nd</sup>” and “no DNA” controls. ELISA development time t=50mins. Error bars are  $1.96 \times$  Standard Error.

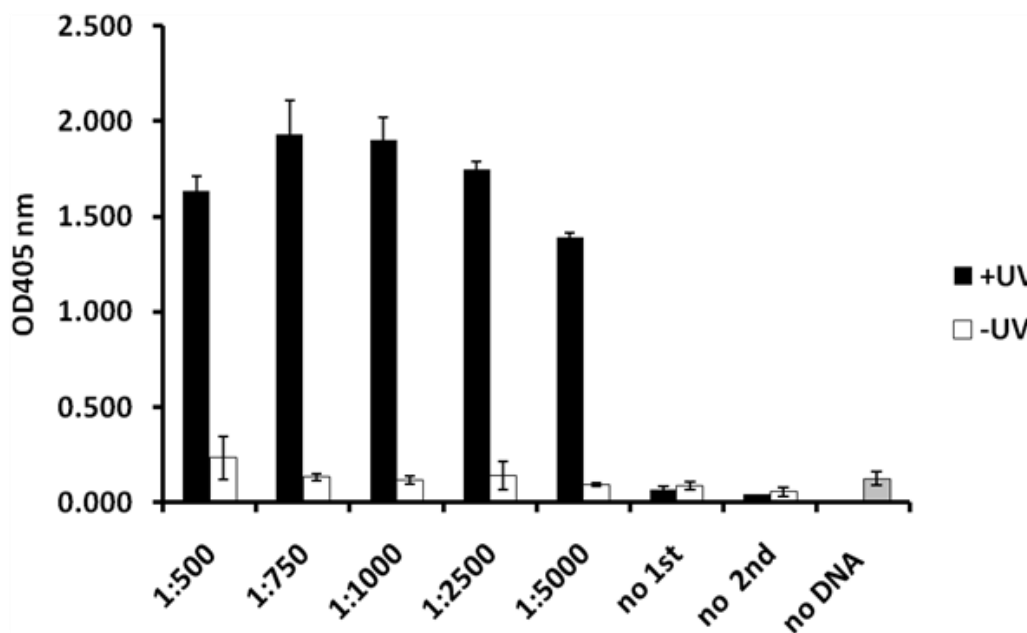

|     | 1:500 | 1:750  | 1:1000 | 1:2500 | 1:5000 | no 1st | no 2nd | no DNA |
|-----|-------|--------|--------|--------|--------|--------|--------|--------|
| S/N | 6.986 | 14.582 | 16.286 | 12.526 | 14.690 | 0.775  | 0.746  | -      |

**Figure S.5 - Optimisation of secondary antibody (HRP) dilution with signal to noise ratio S/N.** H3 clone primary antibody used at 1:1000 dilution. Secondary antibody used at 1:500 dilution for “no 1st” and “no DNA” controls. ELISA development time t=50mins. Error bars are  $1.96 \times$  Standard Error.

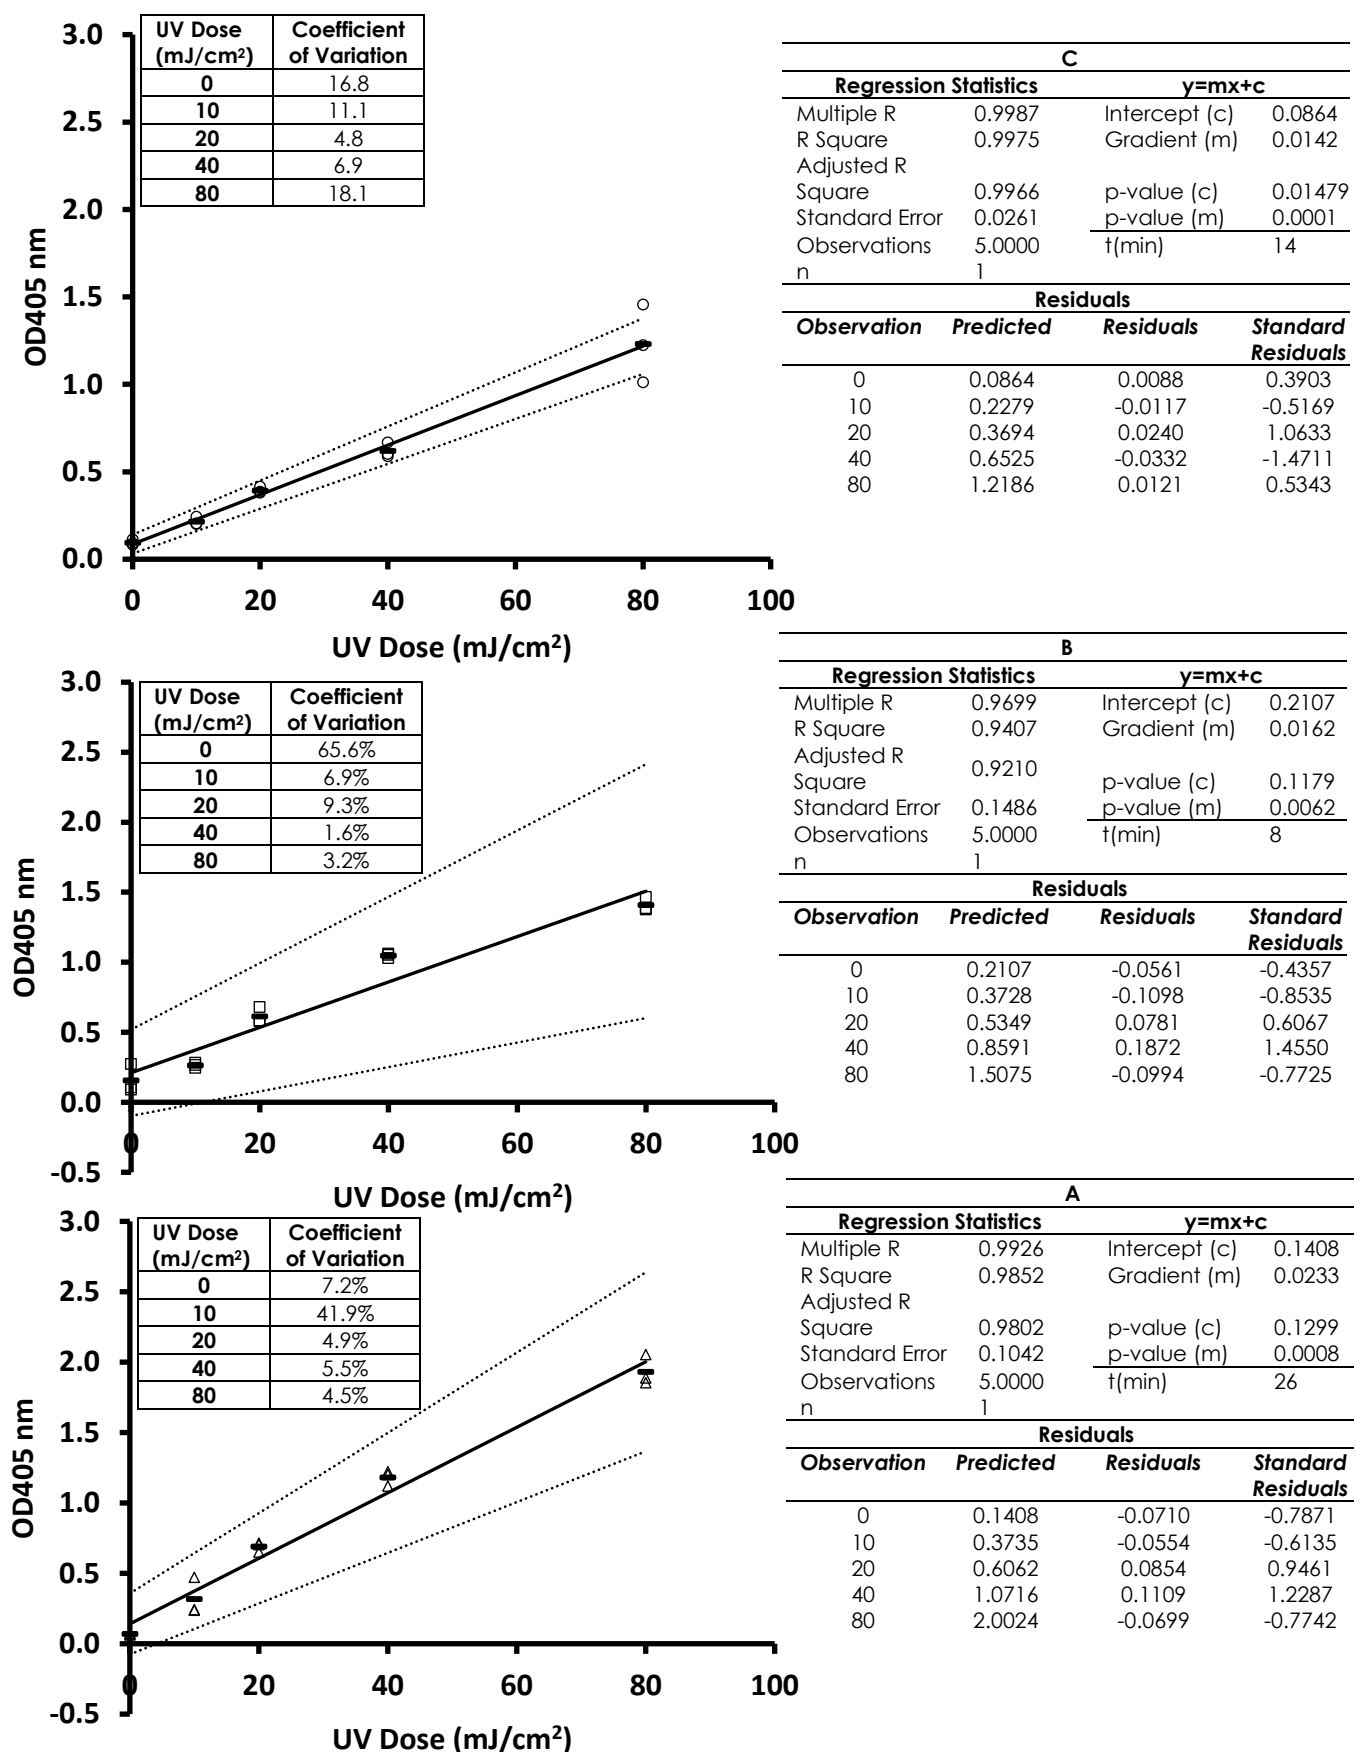

**Figure S.6 - *E. coli* gDNA optimised UV Dose response based on endpoint OD 405nm data for each replicate experiment..** Open shapes ( $\square$   $\circ$   $\Delta$ ) are data points from replicates, solid bar ( $\text{—}$ ) is mean value. Light dotted line represents the 95% confidence interval of the linear regression.

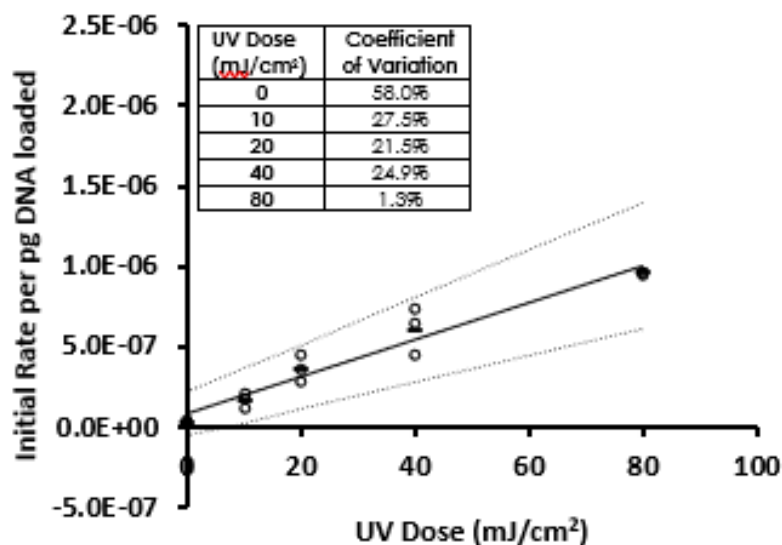

| C                     |          |               |          |
|-----------------------|----------|---------------|----------|
| Regression Statistics |          | y=mx+c        |          |
| Multiple R            | 0.9884   | Intercept (c) | 8.22E-08 |
| R Square              | 0.9769   | Gradient (m)  | 1.15E-08 |
| Adjusted R            |          |               |          |
| Square                | 0.9692   | p-value (c)   | 0.1467   |
| Standard Error        | 6.47E-08 | p-value (m)   | 0.0015   |
| Observations          | 5.0000   | t(min)        | 14       |
| n                     | 1        |               |          |

| Residuals   |           |           |                    |
|-------------|-----------|-----------|--------------------|
| Observation | Predicted | Residuals | Standard Residuals |
| 0           | 8.22E-08  | -5.3E-08  | -0.9518            |
| 10          | 1.97E-07  | -2.4E-08  | -0.4216            |
| 20          | 3.13E-07  | 5.55E-08  | 0.9896             |
| 40          | 5.43E-07  | 6.49E-08  | 1.1572             |
| 80          | 1E-06     | -4.3E-08  | -0.7733            |

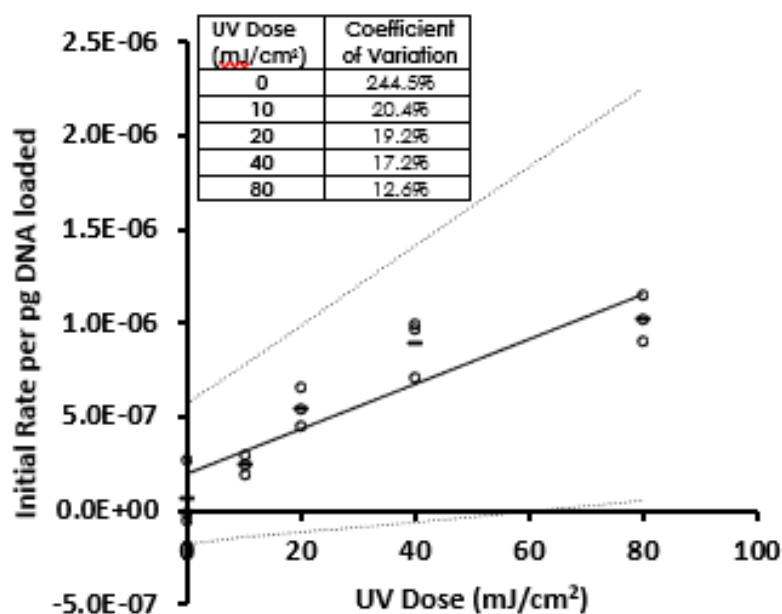

| B                     |          |               |          |
|-----------------------|----------|---------------|----------|
| Regression Statistics |          | y=mx+c        |          |
| Multiple R            | 0.9238   | Intercept (c) | 1.98E-07 |
| R Square              | 0.8535   | Gradient (m)  | 1.19E-08 |
| Adjusted R            |          |               |          |
| Square                | 0.8046   | p-value (c)   | 0.1893   |
| Standard Error        | 1.80E-07 | p-value (m)   | 0.0249   |
| Observations          | 5.0000   | t(min)        | 8        |
| n                     | 1        |               |          |

| Residuals   |           |           |                    |
|-------------|-----------|-----------|--------------------|
| Observation | Predicted | Residuals | Standard Residuals |
| 0           | 1.98E-07  | -1.3E-07  | -0.8196            |
| 10          | 3.17E-07  | -7.4E-08  | -0.4740            |
| 20          | 4.36E-07  | 1.12E-07  | 0.7222             |
| 40          | 6.73E-07  | 2.16E-07  | 1.3854             |
| 80          | 1.15E-06  | -1.3E-07  | -0.8140            |

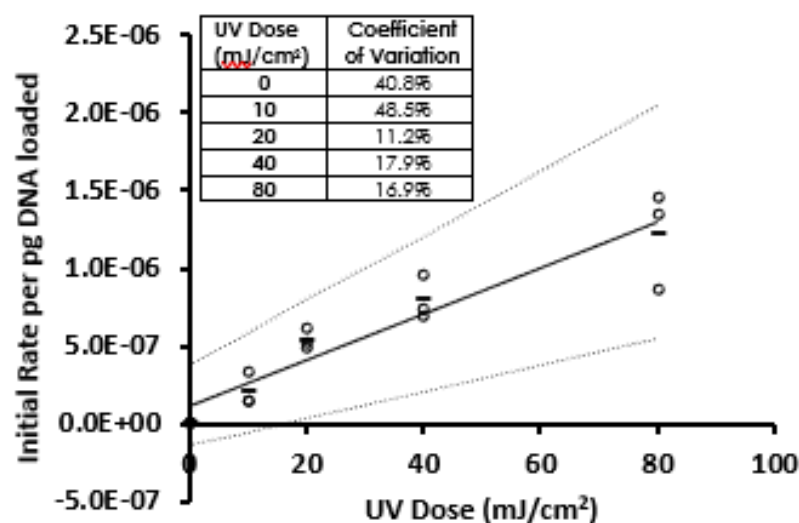

| A                     |          |               |          |
|-----------------------|----------|---------------|----------|
| Regression Statistics |          | y=mx+c        |          |
| Multiple R            | 0.9751   | Intercept (c) | 1.18E-07 |
| R Square              | 0.9509   | Gradient (m)  | 1.43E-08 |
| Adjusted R            |          |               |          |
| Square                | 0.9345   | p-value (c)   | 0.2381   |
| Standard Error        | 1.23E-07 | p-value (m)   | 0.0047   |
| Observations          | 5.0000   | t(min)        | 26       |
| n                     | 1        |               |          |

| Residuals   |           |           |                    |
|-------------|-----------|-----------|--------------------|
| Observation | Predicted | Residuals | Standard Residuals |
| 0           | 1.18E-07  | -1.1E-07  | -1.0023            |
| 10          | 2.65E-07  | -4.5E-08  | -0.4210            |
| 20          | 4.13E-07  | 1.3E-07   | 1.2223             |
| 40          | 7.09E-07  | 9.65E-08  | 0.9079             |
| 80          | 1.3E-06   | -7.5E-08  | -0.7069            |

Figure S.7 - *E. coli* gDNA optimised UV Dose response based on endpoint OD 405nm data for each replicate experiment. Open circles (○) are data points from replicates, solid bar (—) is mean value. Light dotted line represents the 95% confidence interval of the linear regression.

|     |         | Initial Rate | Initial Rate Ratio | Endpoint     | End Point Ratio |
|-----|---------|--------------|--------------------|--------------|-----------------|
| A-B | std err | 3.02E-09     | 1.22E-03           | 2.39E-03     | 8.21E-04        |
|     | t       | -0.118       | 2.051              | -0.862       | -0.924          |
|     | df      | 6            | 6                  | 6            | 6               |
|     | p-value | <b>0.910</b> | <b>0.086</b>       | <b>0.422</b> | <b>0.391</b>    |
| A-C | std err | 2.19E-09     | 1.08E-03           | 1.70E-03     | 5.47E-04        |
|     | t       | -1.490       | 0.132              | -5.367       | -4.840          |
|     | df      | 6            | 6                  | 6            | 6               |
|     | p-value | <b>0.187</b> | <b>0.899</b>       | 0.002        | 0.003           |
| B-C | std err | 3.44E-09     | 1.38E-03           | 2.87E-03     | 9.66E-04        |
|     | t       | -0.846       | -1.712             | -2.460       | -1.957          |
|     | df      | 6            | 6                  | 6            | 6               |
|     | p-value | <b>0.430</b> | <b>0.138</b>       | 0.049        | <b>0.098</b>    |

**Table S.1** – Pairwise t-Test based (Real-Stats SlopesTest) significance testing (t-test) of slope of replicate assays A-C. Level of significance 95% significance testing of the slopes of individual replicates A-C by initial rate, initial rate ratio, endpoint and endpoint ratio. Ratio data are the ratio of endpoints or initial rates for 0, 10, 20, 40, and 80 mJ/cm<sup>2</sup> *in vivo* treated *E.coli* gDNA to a 500mJ/cm<sup>2</sup> treated naked *E.coli* gDNA control.

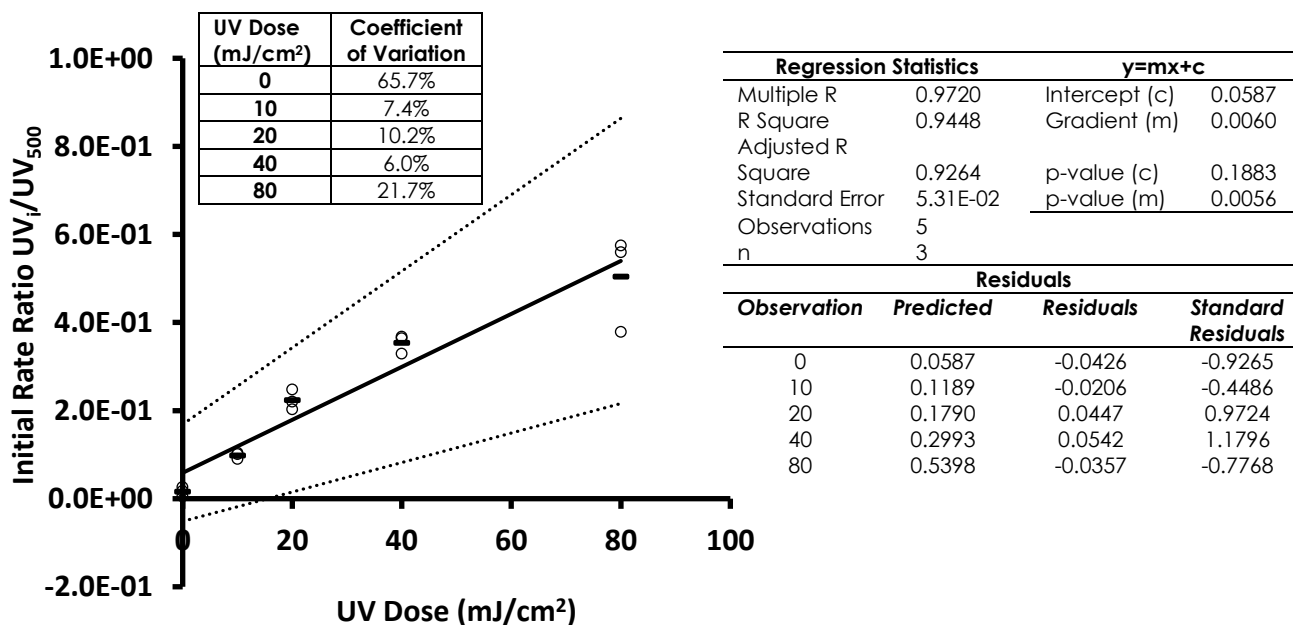

**Figure S.8** - *E. coli* gDNA Optimised UV Dose response based on initial rate data as a ratio of the initial rate for 500mJ/cm<sup>2</sup> treated naked *E.coli* gDNA (Ratio: Initial Rates UV<sub>i</sub>/UV<sub>500</sub>) for three replicate experiments. (○) are the means of the three replicates A-C from figures data points from three replicate experiments, solid bar (—) is mean value. Light dotted line represents the 95% confidence interval of the linear regression.

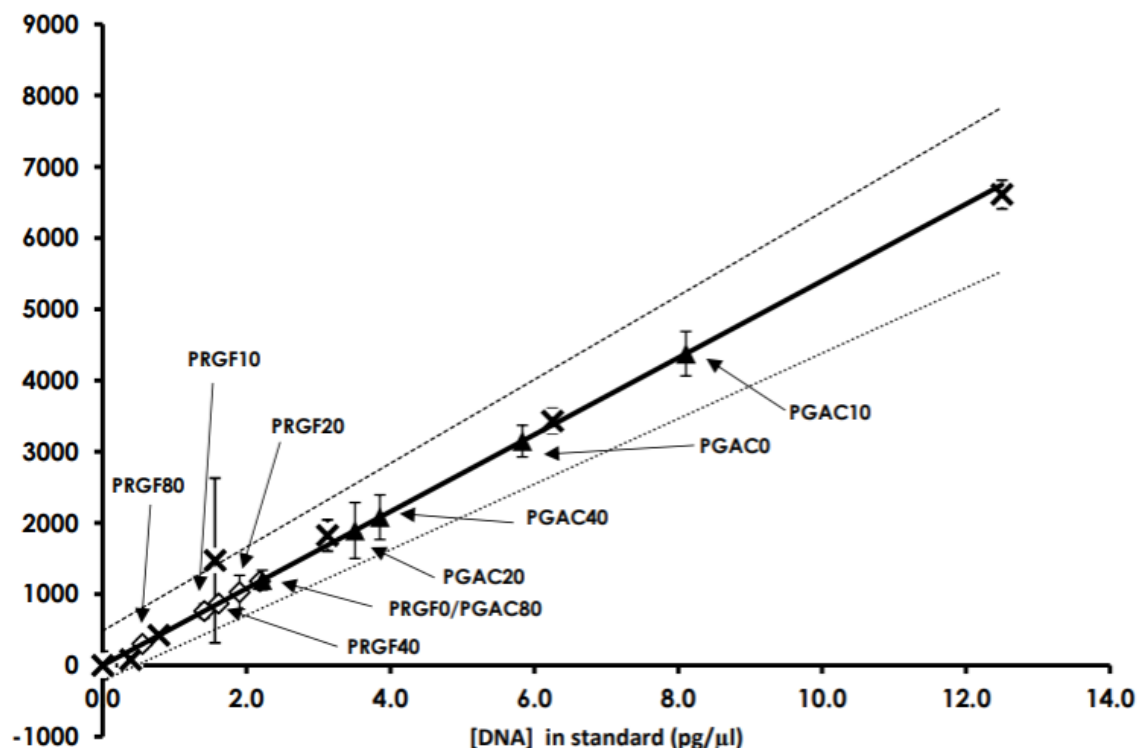

| Sample Point   | UV Dose (mJ/cm <sup>2</sup> ) | Picogreen OD <sub>520</sub> | pg/ul Sample |
|----------------|-------------------------------|-----------------------------|--------------|
| PRGF diamonds  | 0                             | 1179                        | 13.51        |
|                | 10                            | 762                         | 8.73         |
|                | 20                            | 1027                        | 11.76        |
|                | 40                            | 870                         | 9.96         |
|                | 80                            | 298                         | 3.42         |
| PGAC triangles | 0                             | 3148                        | 36.06        |
|                | 10                            | 4376                        | 50.12        |
|                | 20                            | 1893                        | 21.69        |
|                | 40                            | 2080                        | 23.83        |
|                | 80                            | 1198                        | 13.31        |

| Regression Statistics |                 | y=mx+c        |                    |
|-----------------------|-----------------|---------------|--------------------|
| Multiple R            | 0.9944          | Intercept (c) | 135.045            |
| R Square              | 0.9888          | Gradient (m)  | 523.812            |
| Adjusted R Square     | 0.9865          | p-value (c)   | 0.366              |
| Standard Error        | 275.235         | p-value (m)   | 4.535E-6           |
| Observations          | 7               |               |                    |
| Residuals             |                 |               |                    |
| Observation           | Predicted OD405 | Residuals     | Standard Residuals |
| 0.0000                | 135             | -135          | -0.537             |
| 0.3906                | 340             | -260          | -1.033             |
| 0.7813                | 544             | -125          | -0.496             |
| 1.5625                | 954.1           | 519           | 2.065              |
| 3.1250                | 1772            | 51            | 0.204              |
| 6.2500                | 3409            | 22            | 0.087              |
| 12.5000               | 6683            | -73           | -0.289             |

**Figure S.9-** PicoGreen DNA concentration determination from PRGF and PGAC samples. Linear regression of DNA standards at concentrations of 0, 0.391, 0.781, 1.563, 3.125, 6.250, 12.500 pg/μl shown as (X). Sample concentration calculated by (Fluorescence Intensity 520/Gradient of standard curve) / dilution of sample relative to standards in PicoGreen assay (0.1667). 95% confidence interval of the regression shown dotted. Error bars are  $1.96 \times$  Standard Error.
